---

# Erratum

Hegde SV, Adhikari P, Kotian S, Pinto VJ, D'Souza S, D'Souza V. Effect of 3-month yoga on oxidative stress in type 2 diabetes with or without complications: a controlled clinical trial. *Diabetes Care* 2011;34:2208–2210

In the print version of the article listed above, the last sentence in the RESEARCH DESIGN AND METHODS section should have read “Mann-Whitney *U* test, a nonparametric test, was used to compare the differences in various parameters before and after intervention between the two groups” rather than “Wilcoxon signed rank test, a nonparametric test, was used to compare the differences in various parameters before and after intervention between the two groups.” The online version reflects these changes.
